# Supplementary material for: Serotonergic modulation of visual neurons in Drosophila melanogaster
Source: PubMed Central journal article supplement (PMC7485980; doi:10.1371/journal.pgen.1009003), 2020-08-31
Supplement: pgen.1009003.s012.pdf [file pgen.1009003.s012.pdf]

S1 Table. RNA-Seq Serotonin Receptor TPMs, averages and standard deviations.

|         | 5-HT1A | 5-HT1B | 5-HT2A | 5-HT2B | 5-HT7 |
|---------|--------|--------|--------|--------|-------|
| T1      | 165    | 271    | 0.028  | 0.024  | 0.034 |
| T1      | 231    | 305    | 7.53   | 0.000  | 0.000 |
| T1      | 150    | 257    | 0.000  | 0.082  | 0.000 |
| Average | 182    | 278    | 2.52   | 0.035  | 0.011 |
| STDEV   | 43.1   | 24.8   | 4.34   | 0.042  | 0.019 |
|         |        |        |        |        |       |
|         | 5-HT1A | 5-HT1B | 5-HT2A | 5-HT2B | 5-HT7 |
| L2      | 0.006  | 40.9   | 13.3   | 190    | 8.96  |
| L2      | 38.3   | 22.5   | 1.13   | 45.9   | 34.2  |
| L2      | 10.4   | 28.3   | 2.99   | 158    | 3.90  |
| Average | 16.2   | 30.5   | 5.80   | 131    | 15.7  |
| STDEV   | 19.8   | 9.40   | 6.55   | 75.6   | 16.2  |
